# Supplementary material
Source: PubMed Central journal article supplement (PMC7415529)
Supplement: NIHMS1573319-supplement-supplement.pdf [file NIHMS1573319-supplement-supplement.pdf]

Name:

Location:

**Depression**

Since the last Dashain festival, Ram Bahadur looks really down and sad. It seemed to have started when his wife died. Nowadays, along with the loss of interest in his work, he doesn't feel like doing anything, not even taking care of his baby son. These days, as he cannot fall asleep at night and has difficulty sleeping, he feels weak and fatigue. He has started to get angry and irritated with his family and friends even about trivial matters. As he feels easily tired and weak, he has started thinking that he cannot do anything in his life. Since past few days, he has started feeling that his future is dark, because of which he does not want to live or feels that his life is useless. For 5 months he has hardly worked on the field anymore, he just sits at home all day.

Referred by (Name): \_\_\_\_\_

- Teacher     Mother's Group     Traditional Healer     FCHV

**OBSERVATION**

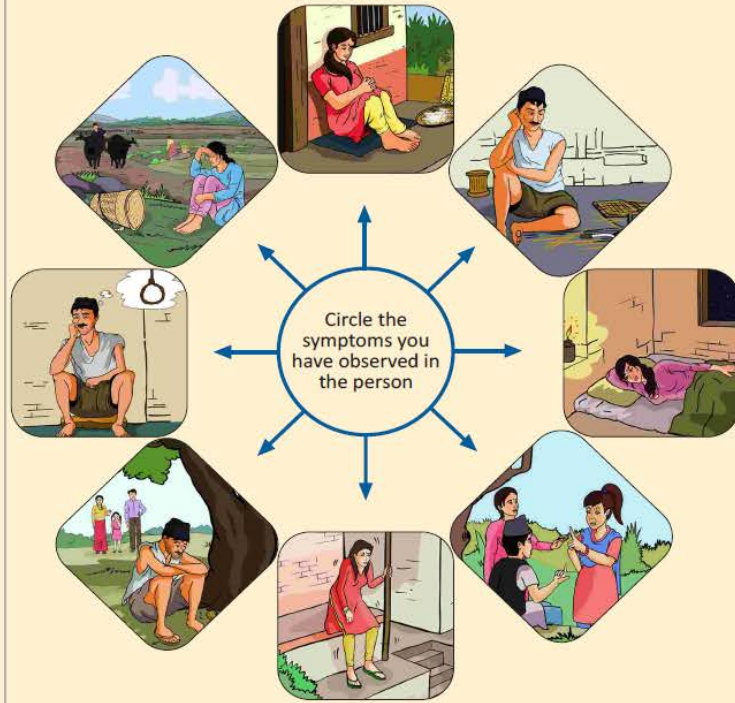

**QUESTIONS**

A1. Does this narrative apply to the person you are talking to now?

- No match (description does not apply) ..... 1 } **Finished**
- Moderate match (person has significant features of this description) ..... 2 }
- Good match (description applies well) ..... 3 } **Go to A2/A3**
- Very good match (person exemplifies description, prototypical case) ..... 4 }

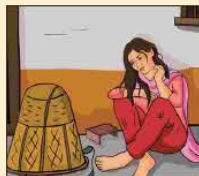

A2. Do the problems have a negative impact on daily functioning?

- No ..... 1
- Yes ..... 2

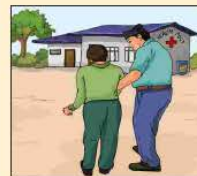

A3. Does this person want support in dealing with these problems?

- No ..... 1
- Yes ..... 2

Results (Total score of items A1, A2 and A3)

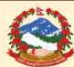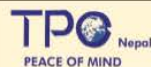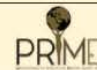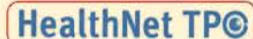

Supplemental Figure S1. Example of CIDT for depression

**Table S1. Schedule of Female Community Health Volunteer (FCHV) training**

**Note: Differences in Community Informant Detection Tool (CIDT) version presented in red text**

**DAY 1**

| Session number | Time        | Content                                                                                                                                                                                                                                                        | Methodology          | Material                                   | Involved Person | Remarks              |
|----------------|-------------|----------------------------------------------------------------------------------------------------------------------------------------------------------------------------------------------------------------------------------------------------------------|----------------------|--------------------------------------------|-----------------|----------------------|
| 1              | 11:00-11:45 | Introduction, expectation collection                                                                                                                                                                                                                           | lectures             | Ball, rope, Meta card                      | 2 counselors    |                      |
| 2              | 11:45-12:20 | Objective of training, Introduction about TPO and prime project                                                                                                                                                                                                | Lectures, Discussion | power point, newsprint, meta card          | 2 counselor     | With Tea break       |
|                | 12:20-12:30 | Tea break                                                                                                                                                                                                                                                      |                      |                                            |                 |                      |
| 3              | 12:30-1:00  | Mental health and problem <ul style="list-style-type: none"> <li>• What is understanding about heart and brain</li> <li>• What is mental health and its problem</li> <li>• You have seen this problem in your community? If yes, write its symptoms</li> </ul> | Group work           | Newsprint, marker, masking tape, meta card | 2 counselor     | Divide with 3 groups |
| 4              | 1:00-2:00   | Lunch time                                                                                                                                                                                                                                                     |                      |                                            |                 |                      |
| 5              | 2:00-2:30   | Mental health and problem <ul style="list-style-type: none"> <li>• What is understanding about heart and brain</li> <li>• What is mental health and its problem</li> <li>• You have seen this problem in your community? If yes, write its symptoms</li> </ul> | Presentation         | Newsprint, Marker, Meta cards              | 2 counselor     |                      |

|   |           |                                                                                                                                                                                                                                                                       |                                     |                                                    |                             |  |
|---|-----------|-----------------------------------------------------------------------------------------------------------------------------------------------------------------------------------------------------------------------------------------------------------------------|-------------------------------------|----------------------------------------------------|-----------------------------|--|
| 6 | 2:30-3:30 | <p>Mental health and problem</p> <ul style="list-style-type: none"> <li>• What is understanding about heart and brain</li> <li>• What is mental health and its problem</li> <li>• You have seen this problem in your community? If yes, write its symptoms</li> </ul> | Lectures ,<br>experience sharing    | Power point,<br>newsprint, marker,<br>masking tape | 2 counselor                 |  |
| 7 | 3:30-3:50 | <p>Explaining referral pathways</p> <p><b>Introduction and purpose of CIDT</b></p>                                                                                                                                                                                    | Lectures, and<br>experience sharing | Power point,<br>newsprint, marker,<br>masking tape | 2 counselor                 |  |
| 8 | 3:50-4:00 | Review of the whole day training                                                                                                                                                                                                                                      | Sharing and<br>discussion           | Meta card, color pen                               | 2 counselor,<br>participant |  |

## Day 2

| Session Number | Time               | Content                                                                                                                                                        | Methodology                              | Material                                           | Involved Person           | Remarks                     |
|----------------|--------------------|----------------------------------------------------------------------------------------------------------------------------------------------------------------|------------------------------------------|----------------------------------------------------|---------------------------|-----------------------------|
| 1-3            | 11:00-1:00         | General referral processes in the community                                                                                                                    | Lectures, discussion                     | Newsprint paper, markers, masking tape, meter card | 2 counselors              | With tea break              |
| <b>1</b>       | <b>11:00-11:30</b> | <b>How does CIDT Works and role of FCHV</b> <ul style="list-style-type: none"> <li><b>Why mental health problem needs to find in our community?</b></li> </ul> | <b>lectures, discussion</b>              | <b>Newsprint, marker, maskingtape, meter card</b>  | <b>2 counselors</b>       |                             |
| <b>2</b>       | <b>11:30-12:15</b> | <b>Phase and process of CIDT</b>                                                                                                                               | <b>Group work</b>                        | <b>power point, newsprint, meta card</b>           | <b>2 counselors</b>       | <b>With Tea break</b>       |
| <b>3</b>       | <b>12:15-1:00</b>  | <b>Phase and process of CIDT</b>                                                                                                                               | <b>Lectures</b>                          | <b>Newsprint, marker, masking tape, meta card</b>  | <b>2 counselors</b>       | <b>Divide with 3 groups</b> |
| <b>4</b>       | <b>1:00-2:00</b>   | <b>Lunch time</b>                                                                                                                                              |                                          |                                                    |                           |                             |
| 5              | 2:00-2:30          | Step: 1 <ul style="list-style-type: none"> <li>Depression</li> <li>Alcohol use disorder</li> <li>Epilepsy</li> <li>Psychosis</li> </ul>                        | Presentation ,role play                  | Newsprint, Marker, Meta cards                      | 2 counselor               |                             |
| 6              | 2:30-3:00          | Feature of Community informant detection tools user                                                                                                            | Lectures , experience sharing            | Power point, newsprint, marker, masking tape       | 2 counselor               |                             |
| 7              | 3:00-3:30          | Introduction about Stigma                                                                                                                                      | Lectures, discussion, experience sharing | Power point, newsprint, marker, masking tape       | 2 counselor               |                             |
| 8              | 3:30-4:00          | Strategy for reducing vulnerability in our community                                                                                                           | Lectures, and experience sharing         | Power point, newsprint, marker, masking tape       | 2 counselor               |                             |
| 9              | 4:00-4:30          | Review of the training and take feedback                                                                                                                       | Sharing and discussion                   | Meta card, marker                                  | Participant and counselor |                             |

**Table S2.** Details of health posts in study

| Health Post Name          | Rural/<br>Peri-<br>Urban | Number<br>of health<br>staff | Study<br>Arm | Community<br>Health<br>Volunteers<br>Trained (N) | Gender of<br>Community<br>Health<br>Volunteers | Total<br>Patient<br>Volume | Depression | AUD | Psychosis | Epilepsy | Other<br>MNS |
|---------------------------|--------------------------|------------------------------|--------------|--------------------------------------------------|------------------------------------------------|----------------------------|------------|-----|-----------|----------|--------------|
| Ayodhayapuri health post  | Rural                    | 2                            | Control      | 10                                               | Female                                         | 12120                      | 3          | 7   | 1         | 9        | 0            |
| Badharjhula UHC           | Rural                    | 1                            | Control      | 1                                                | Female                                         | 12120                      | 6          | 5   | 1         | 2        | 4            |
| Darechowk Health post     | Rural                    | 2                            | Control      | 8                                                | Female                                         | 10769                      | 1          | 6   | 5         | 1        | 0            |
| Gardhi health post        | Rural                    | 3                            | Control      | 8                                                | Female                                         | 10350                      | 6          | 0   | 0         | 9        | 0            |
| Kabilash CHU              | Rural                    | 1                            | Control      | 9                                                | Female                                         | 6521                       | 1          | 3   | 0         | 0        | 0            |
| Kabilash health post      | Rural                    | 3                            | Control      | 9                                                | Female                                         | 6521                       | 4          | 10  | 3         | 0        | 0            |
| Kalyanpur health post     | Rural                    | 1                            | Control      | 9                                                | Female                                         | 7678                       | 5          | 2   | 1         | 3        | 0            |
| Kathar Health Post        | Rural                    | 2                            | Control      | 9                                                | Female                                         | 10851                      | 11         | 2   | 1         | 8        | 1            |
| Kaule Health post         | Rural                    | 2                            | Control      | 8                                                | Female                                         | 6451                       | 0          | 4   | 2         | 3        | 0            |
| Khairani Health Post      | Rural                    | 5                            | Control      | 9                                                | Female                                         | 24027                      | 15         | 5   | 1         | 6        | 0            |
| Korak Health Post         | Rural                    | 3                            | Control      | 5                                                | Female                                         | 7481                       | 4          | 0   | 1         | 0        | 0            |
| Padampur Health Post      | Rural                    | 4                            | Control      | 6                                                | Female                                         | 16835                      | 5          | 6   | 3         | 6        | 0            |
| Bachauli health post      | Rural                    | 4                            | CIDT         | 9                                                | Female                                         | 12202                      | 17         | 8   | 3         | 15       | 1            |
| Bhagauda Hospital         | Rural                    | 7                            | CIDT         | 8                                                | Female                                         | 12285                      | 9          | 5   | 3         | 11       | 5            |
| Bhandara health post      | Rural                    | 2                            | CIDT         | 9                                                | Female                                         | 18091                      | 9          | 6   | 2         | 6        | 0            |
| Birendranagar health post | Rural                    | 3                            | CIDT         | 8                                                | Female                                         | 16772                      | 9          | 7   | 3         | 13       | 8            |
| Chainpur Health Post      | Rural                    | 2                            | CIDT         | 9                                                | Female                                         | 18764                      | 1          | 3   | 5         | 6        | 1            |
| Dhakhani health post      | Rural                    | 2                            | CIDT         | 9                                                | Female                                         | 5465                       | 0          | 10  | 0         | 0        | 0            |
| Jutpani PHC               | Rural                    | 6                            | CIDT         | 7                                                | Female                                         | 16025                      | 19         | 5   | 11        | 12       | 0            |
| kumroj Health Post        | Rural                    | 2                            | CIDT         | 9                                                | Female                                         | 9066                       | 3          | 7   | 4         | 7        | 2            |
| Piple health Post         | Rural                    | 1                            | CIDT         | 9                                                | Female                                         | 17373                      | 11         | 5   | 4         | 8        | 1            |
| Pithuwa Health Post       | Rural                    | 3                            | CIDT         | 9                                                | Female                                         | 14003                      | 7          | 4   | 2         | 10       | 1            |
| Shaktikhor Health Post    | Rural                    | 3                            | CIDT         | 9                                                | Female                                         | 10658                      | 3          | 5   | 2         | 6        | 0            |
| Siddi Health Post         | Rural                    | 2                            | CIDT         | 10                                               | Female                                         | 4410                       | 1          | 0   | 0         | 3        | 0            |

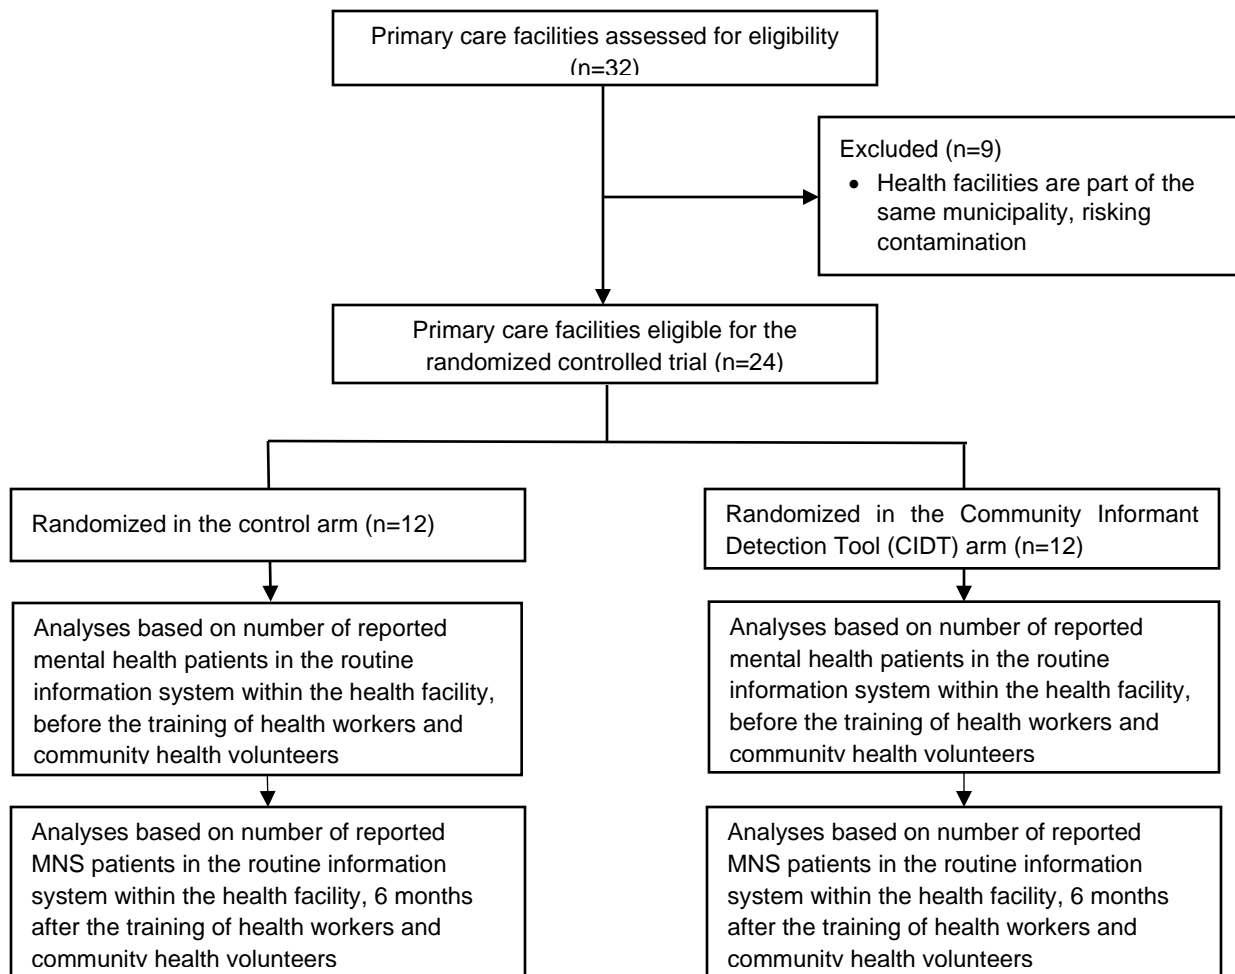

**Supplemental Figure S2. CONSORT flow chart.**

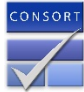

## CONSORT 2010 checklist of information to include when reporting a randomised trial\*

| Section/Topic             | Item No | Checklist item                                                                                                                        | Reported on page No |
|---------------------------|---------|---------------------------------------------------------------------------------------------------------------------------------------|---------------------|
| <b>Title and abstract</b> |         |                                                                                                                                       |                     |
|                           | 1a      | Identification as a randomised trial in the title                                                                                     | 1                   |
|                           | 1b      | Structured summary of trial design, methods, results, and conclusions (for specific guidance see CONSORT for abstracts)               | 3                   |
| <b>Introduction</b>       |         |                                                                                                                                       |                     |
| Background and objectives |         |                                                                                                                                       |                     |
|                           | 2a      | Scientific background and explanation of rationale                                                                                    | 4                   |
|                           | 2b      | Specific objectives or hypotheses                                                                                                     | 5                   |
| <b>Methods</b>            |         |                                                                                                                                       |                     |
| Trial design              |         |                                                                                                                                       |                     |
|                           | 3a      | Description of trial design (such as parallel, factorial) including allocation ratio                                                  | 6                   |
|                           | 3b      | Important changes to methods after trial commencement (such as eligibility criteria), with reasons                                    | No changes          |
| Participants              |         |                                                                                                                                       |                     |
|                           | 4a      | Eligibility criteria for participants                                                                                                 | 6                   |
|                           | 4b      | Settings and locations where the data were collected                                                                                  | 5-6                 |
| Interventions             |         |                                                                                                                                       |                     |
|                           | 5       | The interventions for each group with sufficient details to allow replication, including how and when they were actually administered | 7, as well as 5     |
| Outcomes                  |         |                                                                                                                                       |                     |
|                           | 6a      | Completely defined pre-specified primary and secondary outcome measures, including how and when they were assessed                    | 6                   |
|                           | 6b      | Any changes to trial outcomes after the trial commenced, with reasons                                                                 | No changes          |
| Sample size               |         |                                                                                                                                       |                     |
|                           | 7a      | How sample size was determined                                                                                                        | n/a                 |
|                           | 7b      | When applicable, explanation of any interim analyses and stopping guidelines                                                          | n/a                 |
| Randomisation:            |         |                                                                                                                                       |                     |
| Sequence generation       |         |                                                                                                                                       |                     |
|                           | 8a      | Method used to generate the random allocation sequence                                                                                | 6                   |
|                           | 8b      | Type of randomisation; details of any restriction (such as blocking and block size)                                                   | 6                   |

| <b>Section/Topic</b>                                 | <b>Item No</b> | <b>Checklist item</b>                                                                                                                                                                       | <b>Reported on page No</b> |
|------------------------------------------------------|----------------|---------------------------------------------------------------------------------------------------------------------------------------------------------------------------------------------|----------------------------|
| Allocation concealment mechanism                     | 9              | Mechanism used to implement the random allocation sequence (such as sequentially numbered containers), describing any steps taken to conceal the sequence until interventions were assigned | 6                          |
| Implementation                                       | 10             | Who generated the random allocation sequence, who enrolled participants, and who assigned participants to interventions                                                                     | 6                          |
| Blinding                                             | 11a            | If done, who was blinded after assignment to interventions (for example, participants, care providers, those assessing outcomes) and how                                                    | n/a                        |
|                                                      | 11b            | If relevant, description of the similarity of interventions                                                                                                                                 | 7                          |
| Statistical methods                                  | 12a            | Statistical methods used to compare groups for primary and secondary outcomes                                                                                                               | 7                          |
|                                                      | 12b            | Methods for additional analyses, such as subgroup analyses and adjusted analyses                                                                                                            | n/a                        |
| <b>Results</b>                                       |                |                                                                                                                                                                                             |                            |
| Participant flow (a diagram is strongly recommended) | 13a            | For each group, the numbers of participants who were randomly assigned, received intended treatment, and were analysed for the primary outcome                                              | 8                          |
|                                                      | 13b            | For each group, losses and exclusions after randomisation, together with reasons                                                                                                            | n/a                        |
| Recruitment                                          | 14a            | Dates defining the periods of recruitment and follow-up                                                                                                                                     | 7                          |
|                                                      | 14b            | Why the trial ended or was stopped                                                                                                                                                          | n/a                        |
| Baseline data                                        | 15             | A table showing baseline demographic and clinical characteristics for each group                                                                                                            | n/a                        |
| Numbers analysed                                     | 16             | For each group, number of participants (denominator) included in each analysis and whether the analysis was by original assigned groups                                                     | 7-8, 14                    |
| Outcomes and estimation                              | 17a            | For each primary and secondary outcome, results for each group, and the estimated effect size and its precision (such as 95% confidence interval)                                           | 7-8, 14                    |
|                                                      | 17b            | For binary outcomes, presentation of both absolute and relative effect sizes is recommended                                                                                                 | 7-8, 14                    |
| Ancillary analyses                                   | 18             | Results of any other analyses performed, including subgroup analyses and adjusted analyses, distinguishing pre-specified from exploratory                                                   | n/a                        |
| Harms                                                | 19             | All important harms or unintended effects in each group (for specific guidance see CONSORT for harms)                                                                                       | None to be reported        |
| <b>Discussion</b>                                    |                |                                                                                                                                                                                             |                            |



| <b>Section/Topic</b>     | <b>Item No</b> | <b>Checklist item</b>                                                                                            | <b>Reported on page No</b> |
|--------------------------|----------------|------------------------------------------------------------------------------------------------------------------|----------------------------|
| Limitations              | 20             | Trial limitations, addressing sources of potential bias, imprecision, and, if relevant, multiplicity of analyses | 9                          |
| Generalisability         | 21             | Generalisability (external validity, applicability) of the trial findings                                        | 9                          |
| Interpretation           | 22             | Interpretation consistent with results, balancing benefits and harms, and considering other relevant evidence    | 9-10                       |
| <b>Other information</b> |                |                                                                                                                  |                            |
| Registration             | 23             | Registration number and name of trial registry                                                                   | 3                          |
| Protocol                 | 24             | Where the full trial protocol can be accessed, if available                                                      | n/a                        |
| Funding                  | 25             | Sources of funding and other support (such as supply of drugs), role of funders                                  | 11                         |

\*We strongly recommend reading this statement in conjunction with the CONSORT 2010 Explanation and Elaboration for important clarifications on all the items. If relevant, we also recommend reading CONSORT extensions for cluster randomised trials, non-inferiority and equivalence trials, non-pharmacological treatments, herbal interventions, and pragmatic trials. Additional extensions are forthcoming: for those and for up to date references relevant to this checklist, see [www.consort-statement.org](http://www.consort-statement.org).
